# Supplementary material for: Multi-model approach to quantify groundwater-level prediction uncertainty using an ensemble of global climate models and multiple abstraction scenarios
Source: Copernicus journal article supplement (doi:10.5194/hess-23-2279-2019), 2019-05-13
Supplement: Supplementary file 1 [file hess-23-2279-2019-supplement.zip]

Archive with 2 entries (2 files):
- Revise_Supplementary_materials_hess-2018-580_Updated_Clean_Final.docx
- hess-23-2279-2019-supplement-title-page.pdf
