# Supplementary material for: Multi-model approach to quantify groundwater-level prediction uncertainty using an ensemble of global climate models and multiple abstraction scenarios
Source: Copernicus journal article supplement (doi:10.5194/hess-23-2279-2019), 2019-05-13
Supplement: Supplementary file 1 [file hess-23-2279-2019-supplement.zip › hess-23-2279-2019-supplement-title-page.pdf]

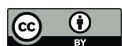

## *Supplement of*

# **Multi-model approach to quantify groundwater-level prediction uncertainty using an ensemble of global climate models and multiple abstraction scenarios**

**Syed M. Touhidul Mustafa et al.**

*Correspondence to:* Syed M. Touhidul Mustafa ([syed.mustafa@vub.be](mailto:syed.mustafa@vub.be))

- [hess-23-2279-2019-supplement-title-page.pdf](#)
- [Revise\\_Supplementary\\_materials\\_hess-2018-580\\_Updated\\_Clean\\_Final.docx](#)

The copyright of individual parts of the supplement might differ from the CC BY 4.0 License.
